# Supplementary material for: Protein Lactylation Modification and Proteomics Features in Cirrhosis Patients after UC-MSC Treatment
Source: MDPI journal article supplement (doi:10.3390/cimb45100532), 2023-10-18
Supplement: s1 [file s1]

## **Supplementary materials and methods**

### **1. Protein extraction and trypsin digestion**

Liver biopsy samples were taken out from -80°C and added liquid nitrogen and fully grinded into powder. Each sample were added with 4 volumes of powder lysis buffer (1% TritonX-100, 1% protease inhibitor, 3μM TSA, 50 mM Nicotinamide (NAM, Sigma, USA)), ultrasonic lysis. Then, the mixture was centrifuged at 12000g at 4°C for 10 min for removing cell fragments. Finally, the supernatant was transferred into a new centrifuge tube, and the protein concentration was determined with a bicinchoninic acid kit (Beyotime Institute of Biotechnology, China). Take an equal amount of each sample protein for enzymatic hydrolysis, add an appropriate amount of standard protein, and adjust the volume to the same with lysate. TCA was added slowly into the sample to 20%. After vortex mix, the mixture was precipitated at 4°C for 2h and then centrifuged at 4500g for 5min. The supernatant was discarded and the precipitated was washed with precooled acetone for 2-3 times. TEAB (Sigma–Aldrich, USA) was added into the precipitation at a final concentration of 200 mM following dispersing by ultrasound. Trypsin (Promega, Madison, WI, USA) was added at a 1:50 trypsin-to-protein mass ratio, and the digestion was performed overnight. Dithiothreitol (DTT, Sigma, USA) was added to make the final concentration of 5 mM and reduced at 37 °C for 60 min. Then, iodoacetamide (IAA, Sigma–Aldrich, USA) was added at the final concentration of 11 mM and incubated at room temperature in the dark for 45 min.

### **2. TMT lable, HPLC fractionation and modify enrichment**

The peptides were desalted with Strata X C18 (Phenomenex) and vacuum freeze-dried. The peptides were dissolved with 0.5M TEAB and labeled TMT according to the operation instructions. Briefly, the labeled reagent was dissolved in acetonitrile after thawing. The mixture added with the peptide

and incubated at room temperature for 2 hours. After that, the mixed labeled peptides were desalted and vacuum freeze-dried. The labeled peptides (6 mg) were separated into fractions by high-pH, reverse-phase High-performance liquid chromatography (HPLC) on an Agilent 300Extend C18 (5  $\mu$ m particles, 4.6 mm inside diameter, 250 mm length; Thermo Fisher Scientific, Waltham, MA, United States). Briefly, peptides were separated into 60 fractions using an acetonitrile gradient of 8–32% acetonitrile (pH 9.0) over 60 min. The peptides were then combined into two fractions and dried by vacuum centrifugation. Peptides dissolved in IP buffer (100 mM NaCl, 1 mM EDTA, 50 mM Tris HCl, 0.5% NP-40, pH 8.0) were incubated with pre-washed lactic acid resin (PTM-1404, Hangzhou Jingjie Biotechnology Co., Ltd., China) overnight at 4°C with gentle shaking. After incubation, the resin was washed with IP buffer solution for four times and with deionized water for twice. Finally, 0.1% trifluoroacetic acid eluent was used to elute the resin bound peptides for three times. For the LC-MS/MS analysis, the peptides were desalted with C18 ZipTips (Merck Millipore, USA) according to the manufacturer's instructions.

### **3. Enrichment-based clustering**

For further hierarchical clustering based on differentially expressed protein functional classification (such as: GO, Domain, Pathway, Complex). We first collated all the categories obtained after enrichment along with their P values, and then filtered for those categories which were at least enriched in one of the clusters with P value <0.05. This filtered P value matrix was transformed by the function  $x = -\log_{10}(\text{P value})$ . Finally, these x values were z-transformed for each functional category. These z scores were then clustered by one-way hierarchical clustering (Euclidean distance, average linkage clustering) in Genesis. Cluster membership were visualized by a heat map using the “heatmap.2” function from the “gplots” R-package.

#### **4. Protein-protein interaction network**

All differentially expressed protein database accession or sequence were searched against the STRING database version 11.0 for protein-protein interactions. Only interactions between the proteins belonging to the searched data set were selected, thereby excluding external candidates. STRING defines a metric called “confidence score” to define interaction confidence; we fetched all interactions that had a confidence score  $\geq 0.7$  (high confidence). Interaction network from STRING was visualized in R package “networkD3”.

## Supplementary figures and tables

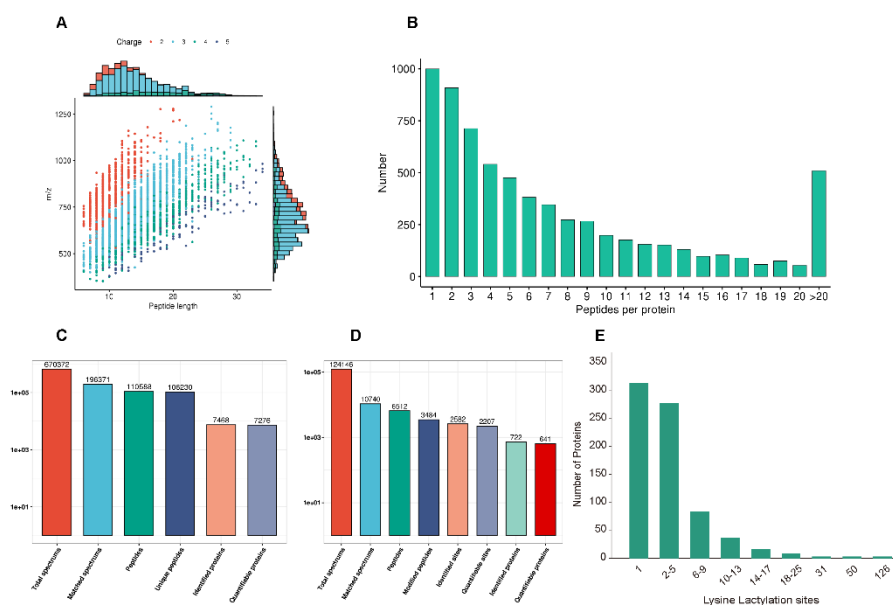

**Figure S1.** overview of lysine lactylation sites and proteins identification. (A) Schematic diagram of peptide length distribution. (B) Peptide number distribution. (C) and (D) The total number of identified peptides and proteins after mass spectrometry data filtering. (E) Statistics of all lactation modification sites on a protein.

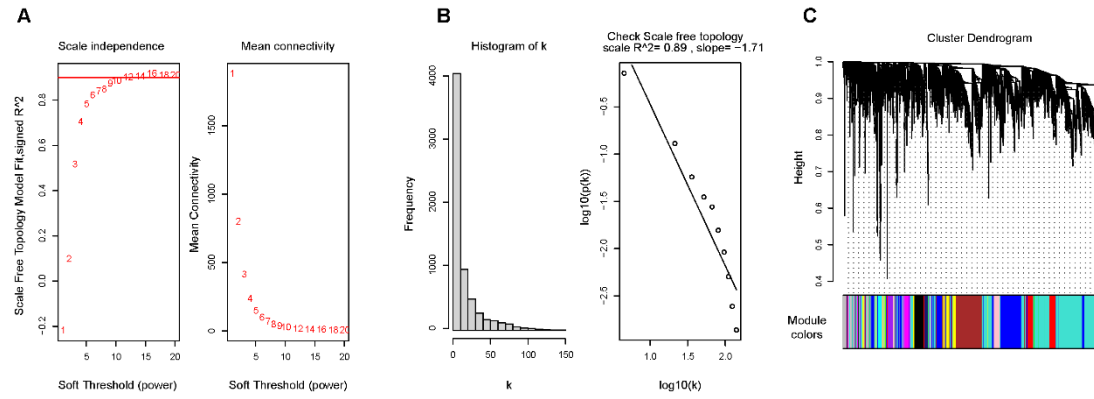

**Figure S2.** (A) Determination of soft threshold (power). (Left) Scale-free topology fit index as a function of different soft threshold (power), the line represents that  $R^2 = 0.9$ ; (Right) Mean connectivity as a function of different soft threshold (power). (B) Check scale-free topology, and here the adjacency matrix was defined using soft-thresholds with  $\beta = 0.9$  for mRNA data. (C) Module hierarchical clustering tree and module profiles. The color row underneath the dendrogram shows the module assignment determined by the Dynamic Tree Cut.

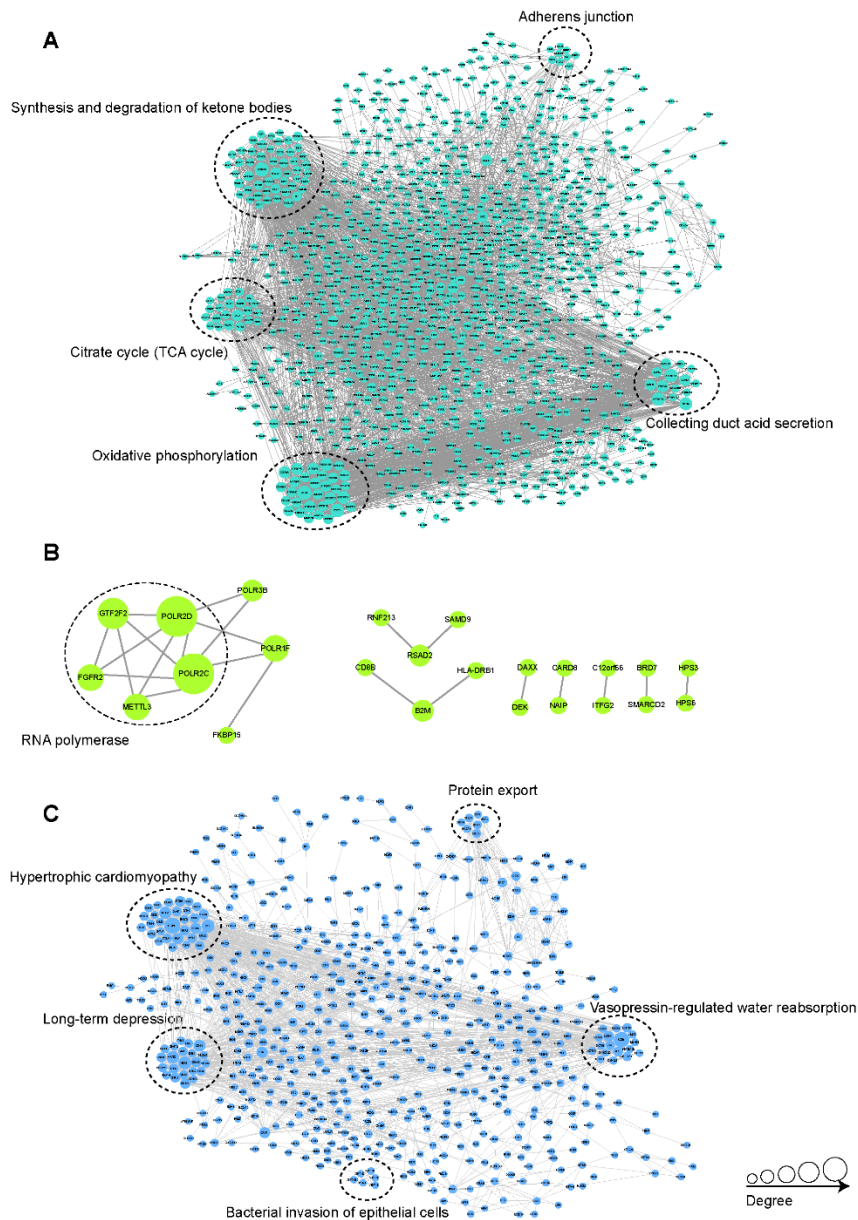

**Figure S3** Protein–protein interaction network of module protein. (A), (B), and (C) is the network interaction diagram of the three module proteins of turquoise, greenyellow and blue. The larger the circle, the more interaction nodes. Show the gene name in the circle. Marks the top 1 KEGG pathway in which each module.

**Supplementary Table S1 Summary of top 10 proteins closely related to ALB**

| <b>Protein</b>  | <b>Gene</b> |            |            |            |            |            |             |             |             |
|-----------------|-------------|------------|------------|------------|------------|------------|-------------|-------------|-------------|
| <b>accessio</b> | <b>name</b> | <b>ALB</b> | <b>PTA</b> | <b>ALT</b> | <b>AST</b> | <b>ALP</b> | <b>TBIL</b> | <b>IBIL</b> | <b>DBIL</b> |
| <b>n</b>        |             |            |            |            |            |            |             |             |             |
| Q86YJ6          | THNS2       | 0.43       | 0.56       | 0.48       | 0.06       | -0.38      | -0.40       | -0.30       | -0.45       |
|                 |             | 0.05       | 0.01       | 0.02       | 0.78       | 0.08       | 0.07        | 0.18        | 0.04        |
| P07357          | CO8A        | 0.43       | 0.55       | -0.17      | -0.28      | -0.17      | -0.38       | -0.33       | -0.39       |
|                 |             | 0.05       | 0.01       | 0.45       | 0.21       | 0.44       | 0.08        | 0.13        | 0.07        |
| Q9BV35          | SCMC<br>3   | 0.44       | 0.50       | 0.03       | -0.21      | -0.42      | -0.48       | -0.46       | -0.45       |
|                 |             | 0.04       | 0.02       | 0.90       | 0.35       | 0.05       | 0.02        | 0.03        | 0.03        |
| O75356          | ENTP5       | 0.45       | 0.44       | -0.16      | -0.41      | -0.52      | -0.55       | -0.46       | -0.57       |
|                 |             | 0.04       | 0.04       | 0.49       | 0.06       | 0.01       | 0.01        | 0.03        | 0.01        |
| Q9Y6B6          | SAR1B       | 0.45       | 0.44       | -0.11      | -0.35      | -0.53      | -0.51       | -0.42       | -0.55       |
|                 |             | 0.04       | 0.04       | 0.63       | 0.11       | 0.01       | 0.02        | 0.05        | 0.01        |
| P08697          | A2AP        | 0.45       | 0.43       | -0.04      | -0.27      | -0.28      | -0.36       | -0.25       | -0.42       |
|                 |             | 0.03       | 0.04       | 0.85       | 0.22       | 0.21       | 0.10        | 0.27        | 0.05        |
| P35542          | SAA4        | 0.46       | 0.58       | -0.05      | -0.41      | -0.46      | -0.51       | -0.32       | -0.62       |
|                 |             | 0.03       | 0.004      | 0.84       | 0.06       | 0.03       | 0.02        | 0.15        | 0.002       |
| P01031          | CO5         | 0.46       | 0.57       | -0.19      | -0.39      | -0.25      | -0.65       | -0.55       | -0.67       |
|                 |             | 0.03       | 0.01       | 0.41       | 0.07       | 0.26       | 0.001       | 0.01        | 0.0006      |
| Q00341          | VIGLN       | 0.47       | 0.44       | 0.17       | -0.18      | -0.51      | -0.42       | -0.37       | -0.43       |
|                 |             | 0.03       | 0.04       | 0.44       | 0.42       | 0.01       | 0.05        | 0.09        | 0.05        |

|        |     |      |      |      |       |       |       |       |       |
|--------|-----|------|------|------|-------|-------|-------|-------|-------|
| P55061 | BI1 | 0.47 | 0.46 | 0.28 | -0.03 | -0.41 | -0.33 | -0.34 | -0.30 |
|        |     | 0.03 | 0.03 | 0.21 | 0.91  | 0.06  | 0.13  | 0.12  | 0.17  |

---

The upper row represents the correlation coefficient, and the lower row represents the  $p$ -value.



**Supplementary Table S2 Summary of top 10 proteins closely related to bilirubin**

| <b>Protein</b>   | <b>Gene</b> |            |            |            |            |            |             |             |             |
|------------------|-------------|------------|------------|------------|------------|------------|-------------|-------------|-------------|
| <b>accession</b> | <b>name</b> | <b>ALB</b> | <b>PTA</b> | <b>ALT</b> | <b>AST</b> | <b>ALP</b> | <b>TBIL</b> | <b>IBIL</b> | <b>DBIL</b> |
| Q5T4D3           | TMTC4       | 0.30       | 0.41       | -0.30      | -0.58      | -0.56      | -0.76       | -0.68       | -0.76       |
|                  |             | 0.17       | 0.06       | 0.18       | 0.005      | 0.01       | 0.00004     | 0.001       | 0.00004     |
| Q658P3           | STEA3       | 0.52       | 0.32       | -0.15      | -0.40      | -0.70      | -0.72       | -0.67       | -0.70       |
|                  |             | 0.01       | 0.14       | 0.51       | 0.07       | 0.0003     | 0.0002      | 0.0007      | 0.0003      |
| P49366           | DHYS        | 0.33       | 0.27       | -0.10      | -0.20      | -0.52      | -0.69       | -0.66       | -0.67       |
|                  |             | 0.13       | 0.22       | 0.66       | 0.37       | 0.01       | 0.0003      | 0.0009      | 0.0007      |
| Q5HYK3           | COQ5        | 0.36       | 0.16       | -0.05      | -0.33      | -0.79      | -0.69       | -0.68       | -0.64       |
|                  |             | 0.10       | 0.47       | 0.82       | 0.14       | 0.00001    | 0.0004      | 0.0005      | 0.001       |
| Q96PD5           | PGRP2       | 0.54       | 0.39       | -0.18      | -0.58      | -0.66      | -0.69       | -0.55       | -0.74       |
|                  |             | 0.01       | 0.08       | 0.41       | 0.005      | 0.001      | 0.000       | 0.01        | 0.0001      |
| Q9NPH3           | IL1AP       | 0.22       | 0.02       | -0.27      | -0.43      | -0.62      | -0.68       | -0.71       | -0.58       |
|                  |             | 0.32       | 0.92       | 0.22       | 0.05       | 0.002      | 0.001       | 0.0002      | 0.004       |
| Q9H488           | OFUT1       | 0.62       | 0.32       | -0.19      | -0.47      | -0.62      | -0.67       | -0.61       | -0.67       |
|                  |             | 0.002      | 0.15       | 0.40       | 0.03       | 0.002      | 0.001       | 0.003       | 0.001       |
| Q9NR31           | SAR1A       | 0.54       | 0.47       | -0.01      | -0.39      | -0.70      | -0.67       | -0.56       | -0.71       |
|                  |             | 0.01       | 0.03       | 0.98       | 0.07       | 0.0003     | 0.0006      | 0.01        | 0.0002      |
| Q02318           | CP27A       | 0.31       | 0.16       | -0.20      | -0.39      | -0.70      | -0.67       | -0.69       | -0.60       |
|                  |             | 0.16       | 0.46       | 0.37       | 0.07       | 0.0003     | 0.0006      | 0.0004      | 0.003       |
| P13807           | GYS1        | 0.23       | 0.02       | -0.24      | -0.43      | -0.74      | -0.67       | -0.63       | -0.64       |

---

|      |      |      |      |        |        |       |       |
|------|------|------|------|--------|--------|-------|-------|
| 0.31 | 0.93 | 0.27 | 0.05 | 0.0001 | 0.0007 | 0.002 | 0.001 |
|------|------|------|------|--------|--------|-------|-------|

---

The upper row represents the correlation coefficient, and the lower row represents the  $p$ -value.

**Supplementary Table S3 Summary of lactated protein associated with glycolysis/gluconeogenesis**

| protein<br>accession | protein description                                | gene<br>names | Kla position                                                                         | count |
|----------------------|----------------------------------------------------|---------------|--------------------------------------------------------------------------------------|-------|
| P07327               | Alcohol dehydrogenase 1A                           | ADH1A         | 234, 248, 340, 249, 227, 367, 339, 114,<br>20, 105, 331, 324, 326, 100               | 14    |
| P00325               | All-trans-retinol dehydrogenase [NAD<br>(+)] ADH1B | ADH1B         | 234, 331, 248, 324, 136, 340, 20, 33,<br>249, 227, 326, 339, 114, 326, 316, 105, 100 | 17    |
| P00326               | Alcohol dehydrogenase 1C                           | ADH1C         | 234, 248, 249, 227, 339, 114, 100, 331,<br>20, 105                                   | 10    |
| P08319               | All-trans-retinol dehydrogenase [NAD<br>(+)] ADH4  | ADH4          | 20, 33, 239, 254, 345, 234, 120, 342,<br>132, 336                                    | 10    |
| P11766               | Alcohol dehydrogenase class-3                      | ADH5          | 284                                                                                  | 1     |
| P28332               | Alcohol dehydrogenase 6                            | ADH6          | 17, 232, 227                                                                         | 3     |
| P14550               | Aldo-keto reductase family 1 member A1             | AKR1A1        | 127, 85, 287, 308                                                                    | 4     |
| P30837               | Aldehyde dehydrogenase X,<br>mitochondrial         | ALDH1B<br>1   | 426, 383, 500, 399, 52, 414, 379, 429,<br>364                                        | 9     |
| P05091               | Aldehyde dehydrogenase, mitochondrial              | ALDH2         | 428, 369, 52, 378, 383, 368, 73, 511,<br>355, 159, 155                               | 11    |
| P51648               | Aldehyde dehydrogenase family 3<br>member A2       | ALDH3A<br>2   | 324                                                                                  | 1     |

|        |                                                                                                          |         |                                                         |    |
|--------|----------------------------------------------------------------------------------------------------------|---------|---------------------------------------------------------|----|
| P49419 | Alpha-aminoadipic semialdehyde dehydrogenase                                                             | ALDH7A1 | 537, 439, 93, 389, 390                                  | 5  |
| P49189 | 4-trimethylaminobutyraldehyde dehydrogenase                                                              | ALDH9A1 | 303, 30, 49, 298, 310                                   | 5  |
| P04075 | Fructose-bisphosphate aldolase A                                                                         | ALDOA   | 147, 342, 312, 230, 108, 42, 14                         | 7  |
| P05062 | Fructose-bisphosphate aldolase B                                                                         | ALDOB   | 321, 242, 317, 340, 147, 101, 13, 108, 140, 243, 49, 99 | 13 |
| P09972 | Fructose-bisphosphate aldolase C                                                                         | ALDOC   | 108, 147, 42                                            | 3  |
| P10515 | Dihydrolipoyllysine-residue acetyltransferase component of pyruvate dehydrogenase complex, mitochondrial | DLAT    | 473                                                     | 1  |
| P09622 | Dihydrolipoyl dehydrogenase, mitochondrial                                                               | DLD     | 430, 267, 159, 166, 66                                  | 5  |
| P06733 | Alpha-enolase                                                                                            | ENO1    | 71, 64, 81, 330, 92, 420, 233, 80, 202, 60, 28, 193     | 12 |
| P13929 | Beta-enolase                                                                                             | ENO3    | 28                                                      | 1  |
| P09467 | Fructose-1,6-bisphosphatase 1                                                                            | FBP1    | 110, 101, 151, 334                                      | 4  |
| O00757 | Fructose-1,6-bisphosphatase isozyme 2                                                                    | FBP2    | 208                                                     | 1  |
| Q96C23 | Galactose mutarotase                                                                                     | GALM    | 101                                                     | 1  |
| P04406 | Glyceraldehyde-3-phosphate dehydrogenase                                                                 | GAPDH   | 117, 219, 215, 251, 271, 194, 263, 139                  | 8  |
| P06744 | Glucose-6-phosphate isomerase                                                                            | GPI     | 234, 252, 447, 454                                      | 4  |

---

|        |                                                           |       |                                      |   |
|--------|-----------------------------------------------------------|-------|--------------------------------------|---|
| Q2TB90 | Hexokinase HKDC1                                          | HKDC1 | 527                                  | 1 |
| P00338 | L-lactate dehydrogenase A chain                           | LDHA  | 14, 318, 243, 222, 81                | 5 |
| Q16822 | Phosphoenolpyruvate carboxykinase<br>[GTP], mitochondrial | PCK2  | 294, 578, 489, 108                   | 4 |
| P17858 | ATP-dependent 6-phosphofructokinase,<br>liver type        | PFKL  | 392, 397, 677                        | 3 |
| P08237 | ATP-dependent 6-phosphofructokinase,<br>muscle type       | PFKM  | 678                                  | 1 |
| P18669 | Phosphoglycerate mutase 1                                 | PGAM1 | 106, 251, 113, 100, 253              | 5 |
| P15259 | Phosphoglycerate mutase 2                                 | PGAM2 | 251, 100                             | 2 |
| P00558 | Phosphoglycerate kinase 1                                 | PGK1  | 216,131, 192, 323, 91, 220, 141, 291 | 8 |
| P36871 | Phosphoglucomutase-1                                      | PGM1  | 457, 164, 16, 349                    | 4 |
| P14618 | Pyruvate kinase PKM                                       | PKM   | 247                                  | 1 |
| P60174 | Triosephosphate isomerase                                 | TPI1  | 142, 194, 19, 69, 188, 175           | 6 |

---
